# Supplementary material for: Crystal growth and characterization of solvated organic charge-transfer complexes built on TTF and 9-dicyanomethylenefluorene derivatives
Source: Royal Society of Chemistry journal article supplement (doi:10.1039/c5ce01059d), 2015-01-01
Supplement: c5ce01059d1.pdf [file c5ce01059d1.pdf]

## Crystal growth and characterization of solvated organic charge-transfer complexes built on TTF and 9-dicyanomethylene fluorene derivatives

Amparo Salmerón-Valverde,<sup>a</sup> Sylvain Bernès<sup>b</sup>

<sup>a</sup> Centro de Química del Instituto de Ciencias, Benemérita Universidad Autónoma de Puebla, Ciudad Universitaria, San Manuel, 72570 Puebla, Mexico. E-mail: [asv8085@yahoo.com.mx](mailto:asv8085@yahoo.com.mx)

<sup>b</sup> Instituto de Física, Benemérita Universidad Autónoma de Puebla, Av. San Claudio y 18 Sur, 72570 Puebla, Mexico. E-mail: [sylvain\\_bernes@hotmail.com](mailto:sylvain_bernes@hotmail.com)

### Electronic Supplementary Information (ESI)

|                                                                                                                                                                            | Page |
|----------------------------------------------------------------------------------------------------------------------------------------------------------------------------|------|
| <b>Fig. S1</b> FTIR spectrum of acceptor DDF                                                                                                                               | 3    |
| <b>Fig. S2</b> FTIR spectra of DDF <sup>-</sup> salts. (a) M <sup>+</sup> = Li <sup>+</sup> , (b) M <sup>+</sup> = Na <sup>+</sup>                                         | 3    |
| <b>Fig. S3</b> FTIR spectrum of acceptor DTF                                                                                                                               | 4    |
| <b>Fig. S4</b> FTIR spectra of DTF <sup>-</sup> salts. (a) M <sup>+</sup> = Li <sup>+</sup> , (b) M <sup>+</sup> = Na <sup>+</sup>                                         | 4    |
| <b>Fig. S5</b> FTIR spectrum of acceptor DC2TF                                                                                                                             | 5    |
| <b>Fig. S6</b> FTIR spectra of DC2TF <sup>-</sup> salts. (a) M <sup>+</sup> = Li <sup>+</sup> , (b) M <sup>+</sup> = Na <sup>+</sup> , (c) M <sup>+</sup> = K <sup>+</sup> | 5    |
| <b>Fig. S7</b> FTIR of compound <b>1</b> , just after crystallization                                                                                                      | 6    |
| <b>Fig. S8</b> FTIR of compound <b>1</b> , three months after crystallization                                                                                              | 6    |
| <b>Fig. S9</b> FTIR of compound <b>2</b> , just after crystallization                                                                                                      | 7    |
| <b>Fig. S10</b> FTIR of compound <b>2</b> , seven months after crystallization                                                                                             | 7    |
| <b>Fig. S11</b> FTIR of compound <b>3</b> , just after crystallization                                                                                                     | 8    |
| <b>Fig. S12</b> FTIR of compound <b>3</b> , one year after crystallization                                                                                                 | 8    |
| <b>Fig. S13</b> FTIR of compound <b>4</b> , just after crystallization                                                                                                     | 9    |
| <b>Fig. S14</b> FTIR of compound <b>4</b> , ten months after crystallization                                                                                               | 9    |
| <b>Fig. S15</b> FTIR of compound <b>5</b>                                                                                                                                  | 10   |
| <b>Fig. S16</b> FTIR of compound <b>6</b>                                                                                                                                  | 10   |
| <b>Table S17</b> Crystal data and structure refinement for complex <b>1</b>                                                                                                | 11   |
| <b>Table S18</b> Hydrogen bonds for <b>1</b> [Å and °]                                                                                                                     | 11   |
| <b>Fig. S19</b> ORTEP view of complex <b>1</b> (asymmetric unit; 30% probability level) and checkCIF/PLATON report (Alert level G omitted)                                 | 12   |
| <b>Table S20</b> Crystal data and structure refinement for complex <b>2</b>                                                                                                | 13   |
| <b>Table S21</b> Hydrogen bonds for <b>2</b> [Å and °]                                                                                                                     | 13   |
| <b>Fig. S22</b> ORTEP view of complex <b>2</b> (asymmetric unit; 30% probability level) and checkCIF/PLATON report (Alert level G omitted)                                 | 14   |

|                  |                                                                                                                                                                                                                                 |    |
|------------------|---------------------------------------------------------------------------------------------------------------------------------------------------------------------------------------------------------------------------------|----|
| <b>Table S23</b> | Crystal data and structure refinement for complex <b>3</b>                                                                                                                                                                      | 15 |
| <b>Table S24</b> | Hydrogen bonds for <b>3</b> [Å and °]                                                                                                                                                                                           | 15 |
| <b>Fig. S25</b>  | ORTEP view of complex <b>3</b> (asymmetric unit; 20% probability level) and checkCIF/PLATON report (Alert level G omitted)                                                                                                      | 16 |
| <b>Table S26</b> | Crystal data and structure refinement for complex <b>4</b>                                                                                                                                                                      | 17 |
| <b>Table S27</b> | Hydrogen bonds for <b>4</b> [Å and °]                                                                                                                                                                                           | 17 |
| <b>Fig. S28</b>  | ORTEP view of complex <b>4</b> (asymmetric unit; 20% probability level) and checkCIF/PLATON report (Alert level G omitted)                                                                                                      | 18 |
| <b>Table S29</b> | Crystal data and structure refinement for complex <b>5</b>                                                                                                                                                                      | 19 |
| <b>Table S30</b> | Hydrogen bonds for <b>5</b> [Å and °]                                                                                                                                                                                           | 19 |
| <b>Fig. S31</b>  | ORTEP view of complex <b>5</b> (30% probability level) and checkCIF/PLATON report (Alert level G omitted). Unlabelled atoms are generated by symmetry operators 1-x, y, 3/2-z (DC2TF molecule) and 1-x, 1-y, 1-z (TTF molecule) | 20 |
| <b>Table S32</b> | Crystal data and structure refinement for complex <b>6</b>                                                                                                                                                                      | 21 |
| <b>Table S33</b> | Hydrogen bonds for <b>6</b> [Å and °]                                                                                                                                                                                           | 21 |
| <b>Fig. S34</b>  | ORTEP view of complex <b>6</b> (30% probability level) and checkCIF/PLATON report (Alert level G omitted). Unlabelled atoms in one TTF molecule are generated by symmetry operator -x, -y, 2-z                                  | 22 |

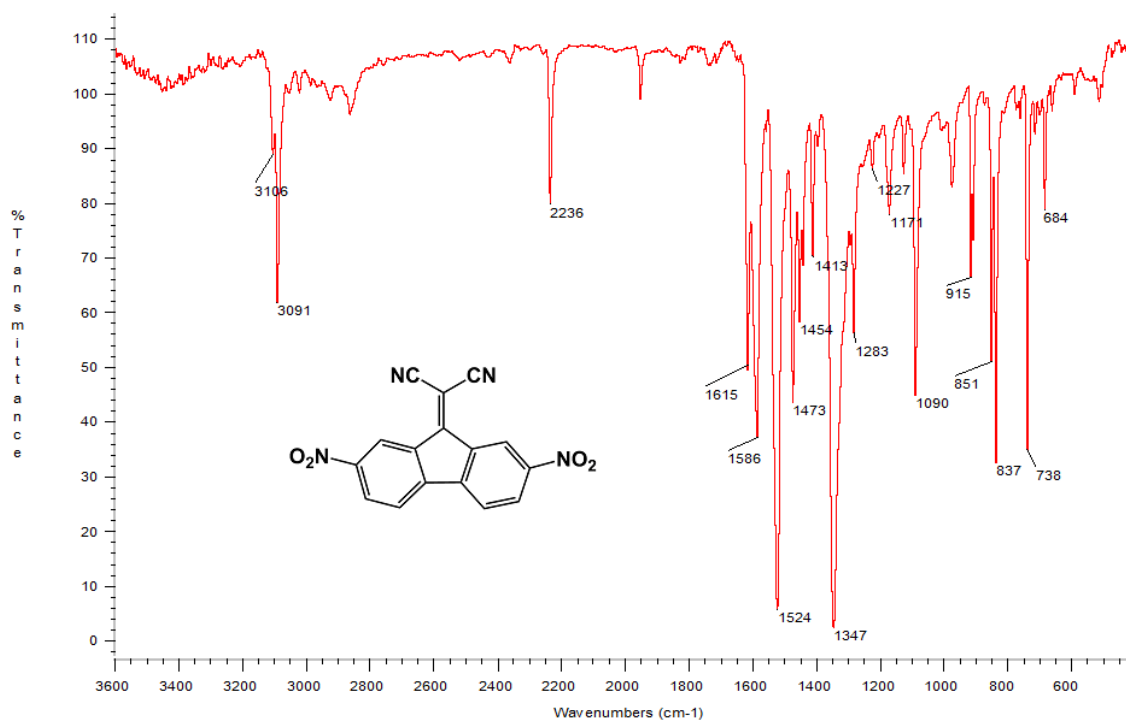

**Fig. S1** FTIR spectrum of acceptor DDF

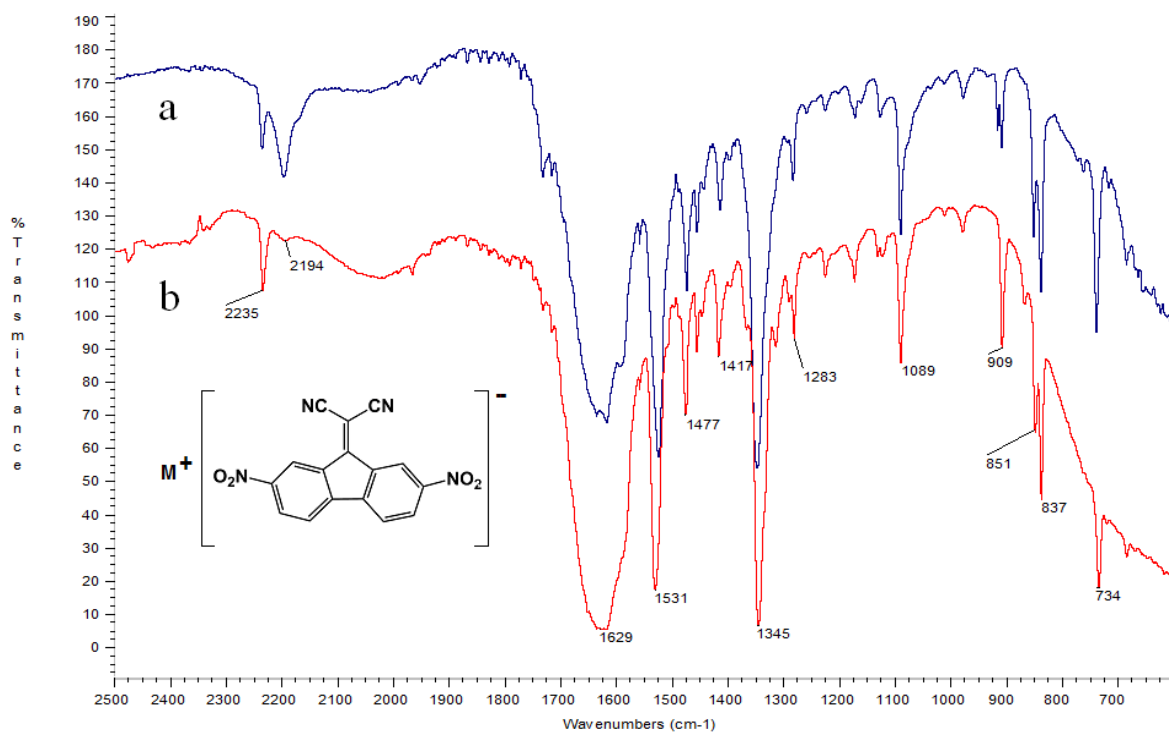

**Fig. S2** FTIR spectra of DDF<sup>-</sup> salts. (a) M<sup>+</sup> = Li<sup>+</sup>, (b) M<sup>+</sup> = Na<sup>+</sup>

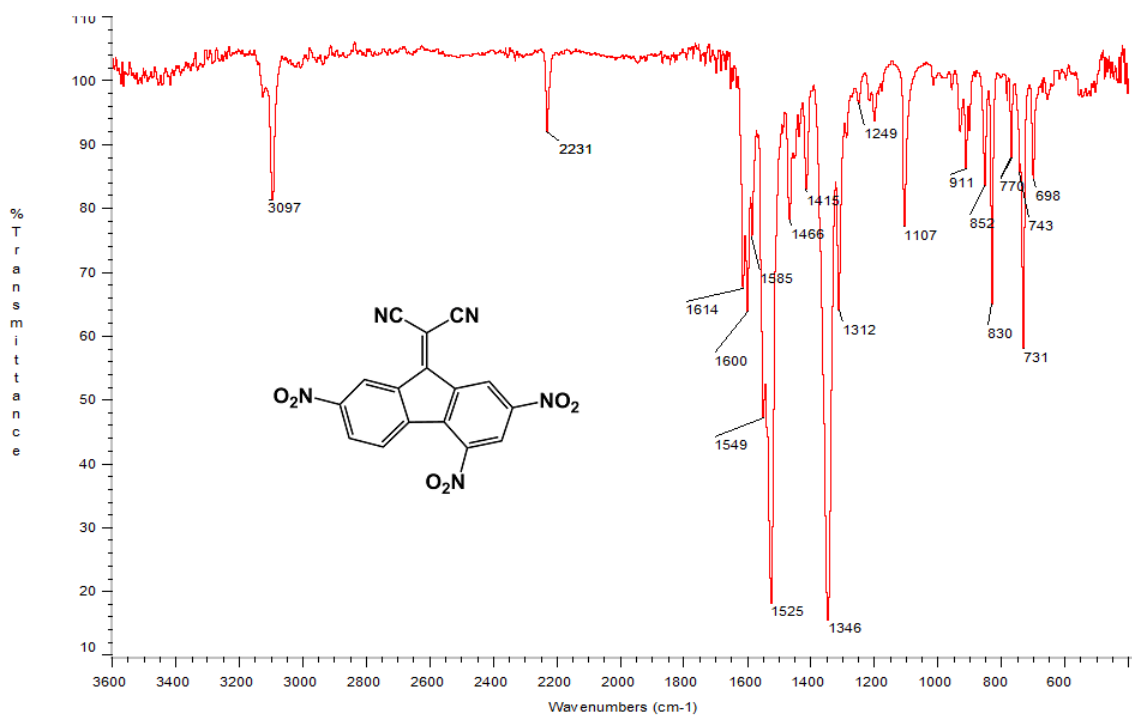

**Fig. S3** FTIR spectrum of acceptor DTF

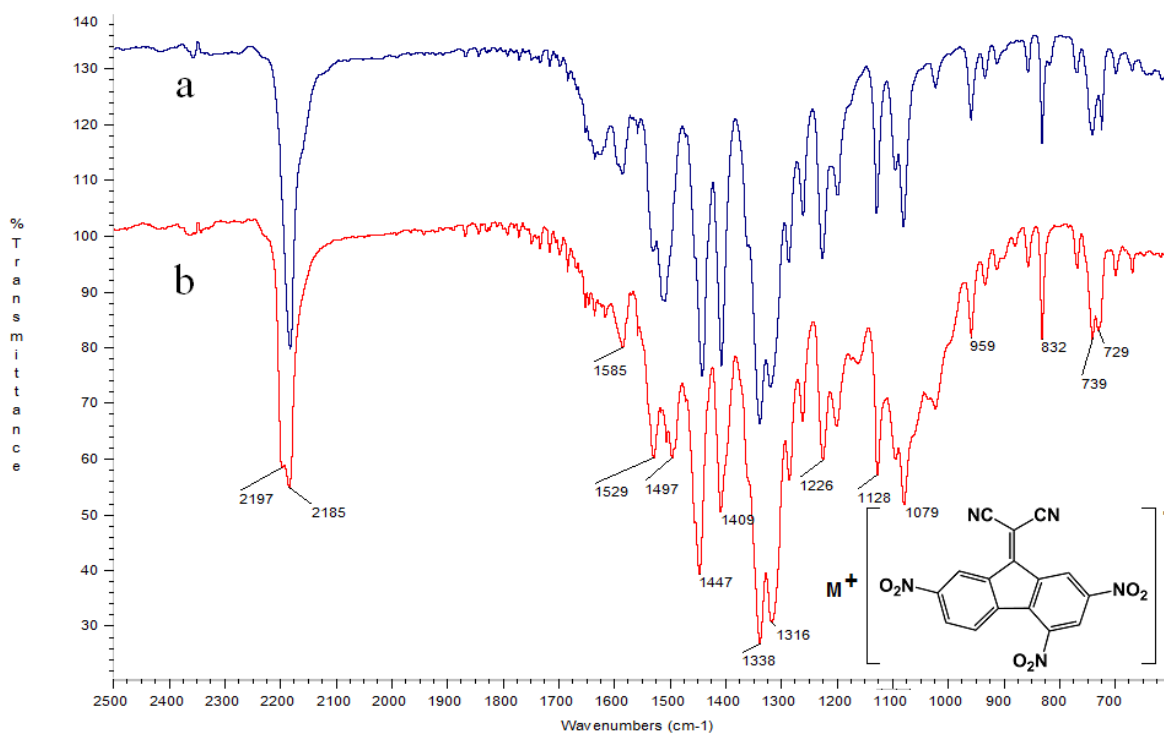

**Fig. S4** FTIR spectra of DTF<sup>-</sup> salts. (a) M<sup>+</sup> = Li<sup>+</sup>, (b) M<sup>+</sup> = Na<sup>+</sup>

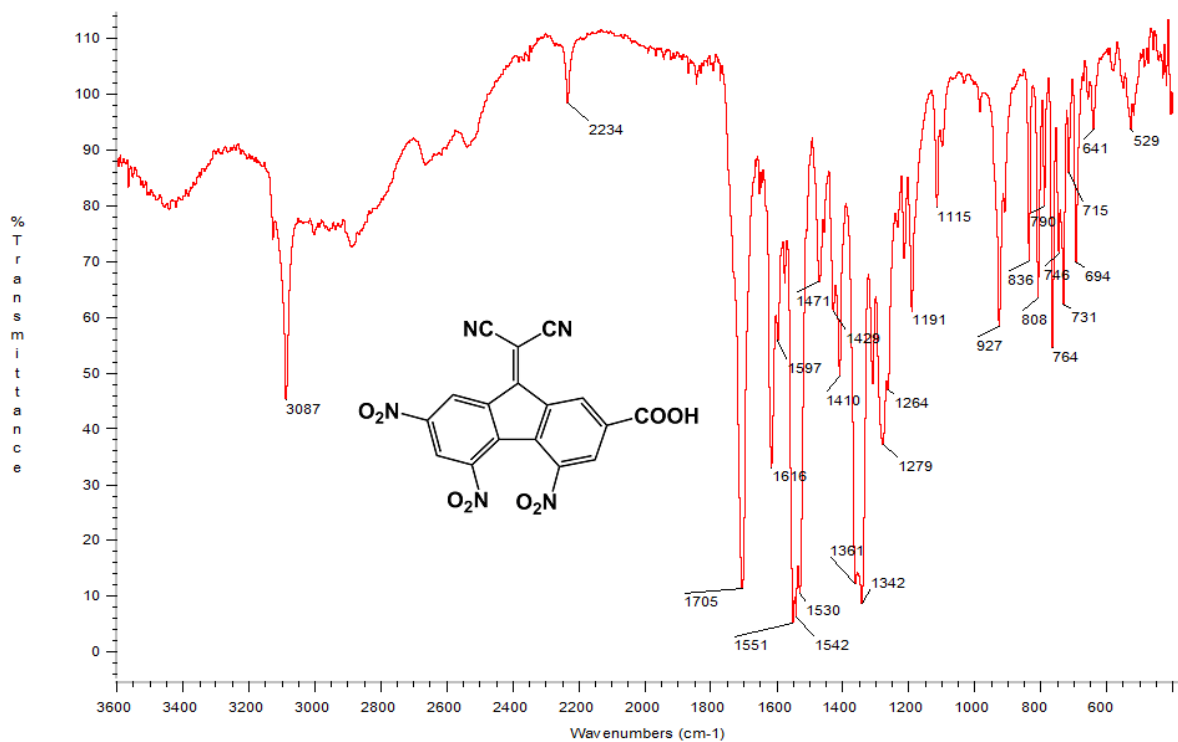

**Fig. S5** FTIR spectrum of acceptor DC2TF

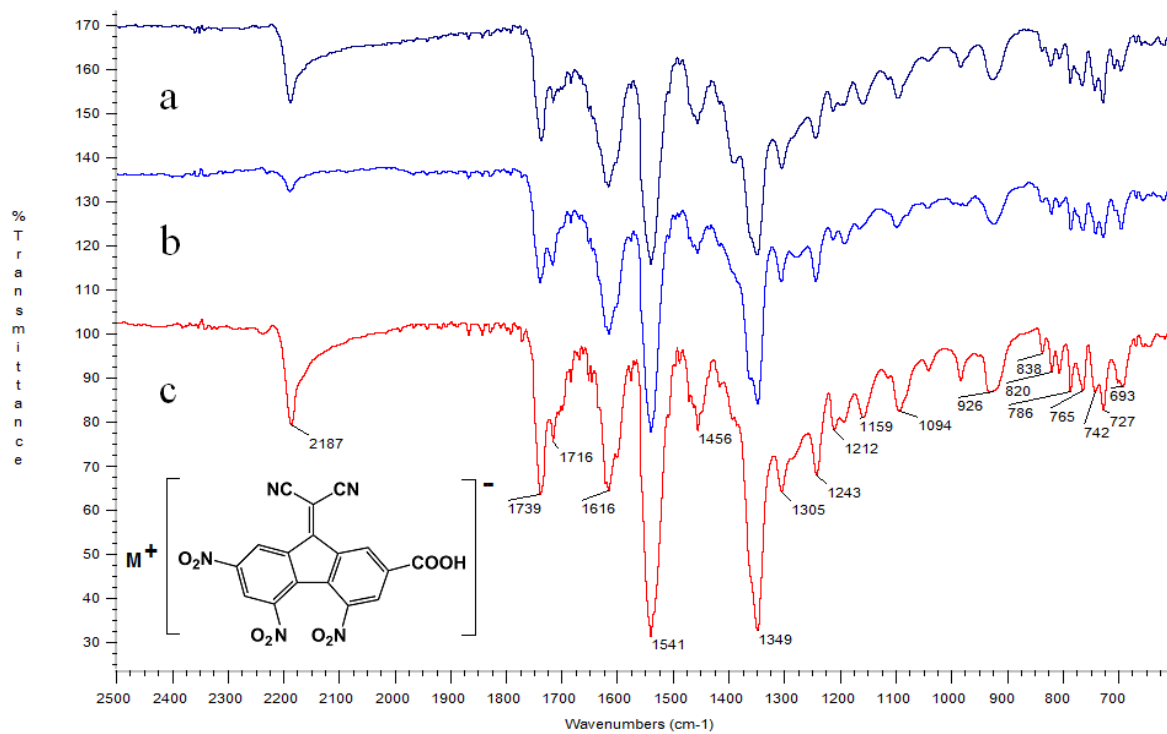

**Fig. S6** FTIR spectra of DC2TF<sup>-</sup> salts. (a) M<sup>+</sup> = Li<sup>+</sup>, (b) M<sup>+</sup> = Na<sup>+</sup>, (c) M<sup>+</sup> = K<sup>+</sup>

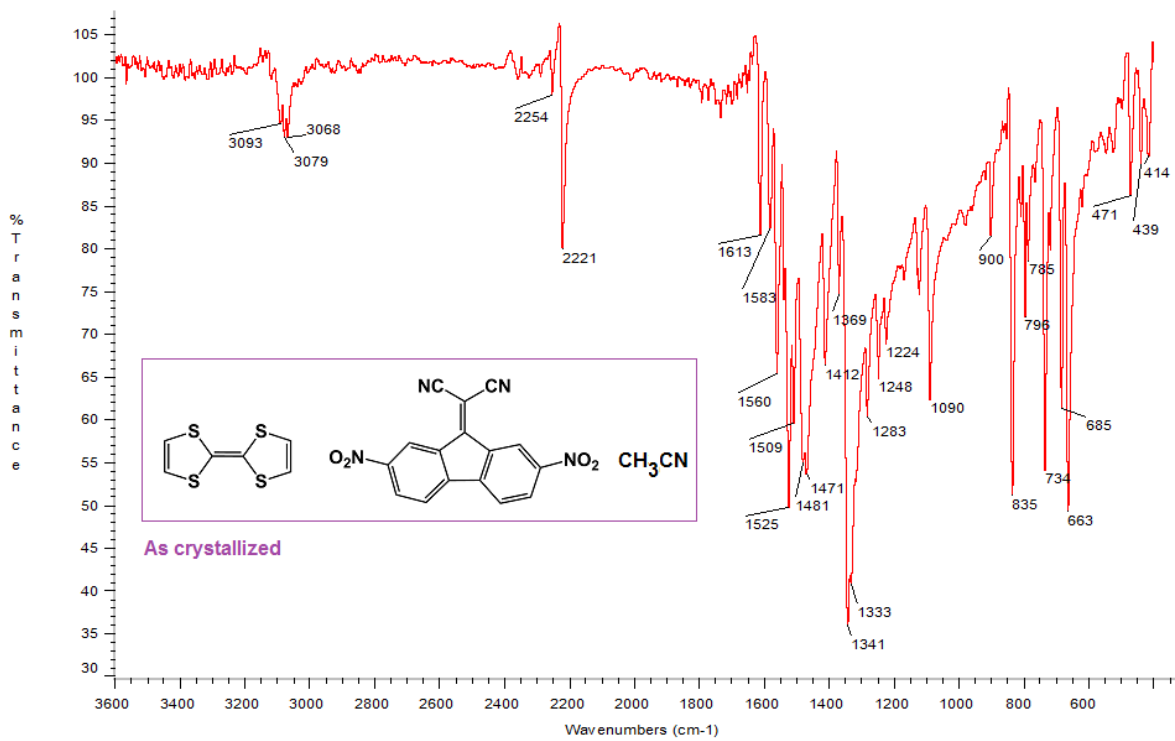

Fig. S7 FTIR of compound **1**, just after crystallization

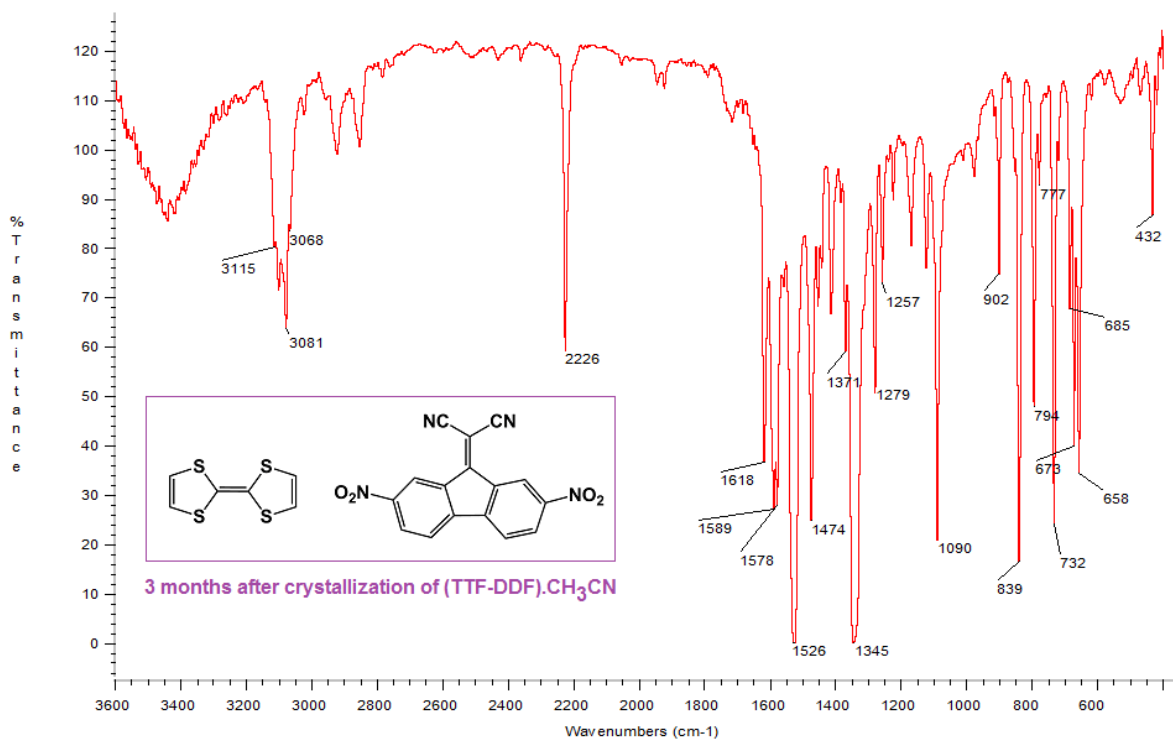

Fig. S8 FTIR of compound **1**, three months after crystallization

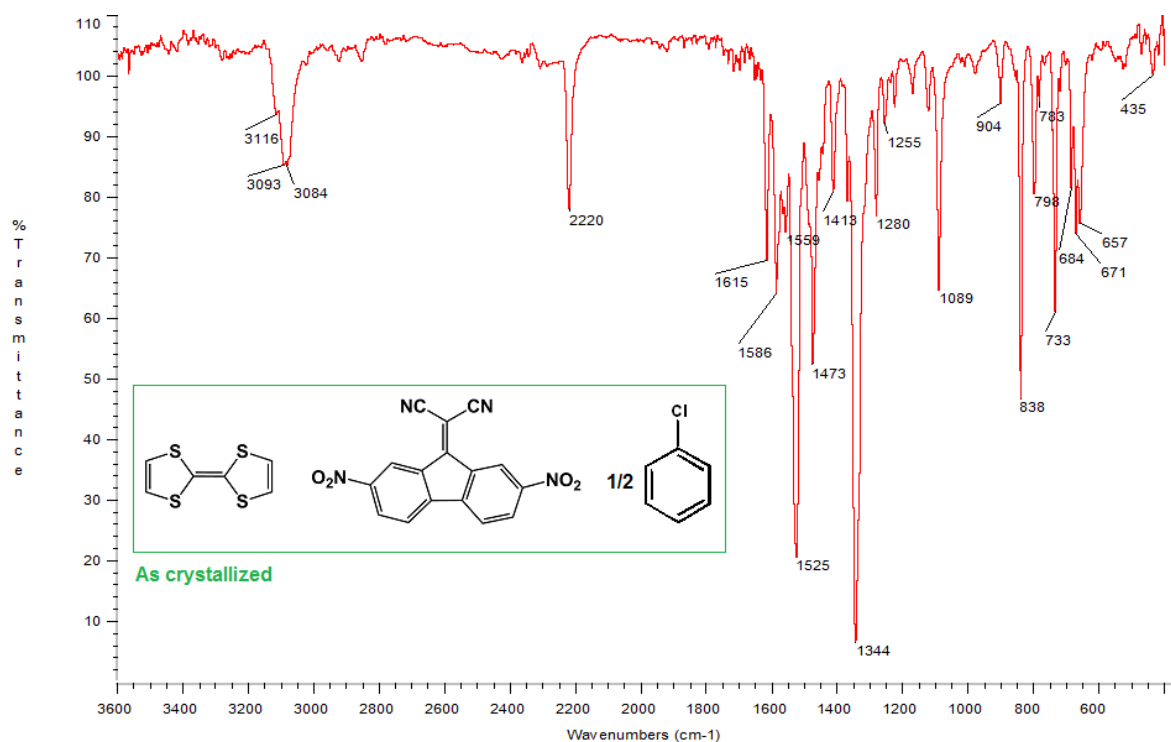

Fig. S9 FTIR of compound 2, just after crystallization

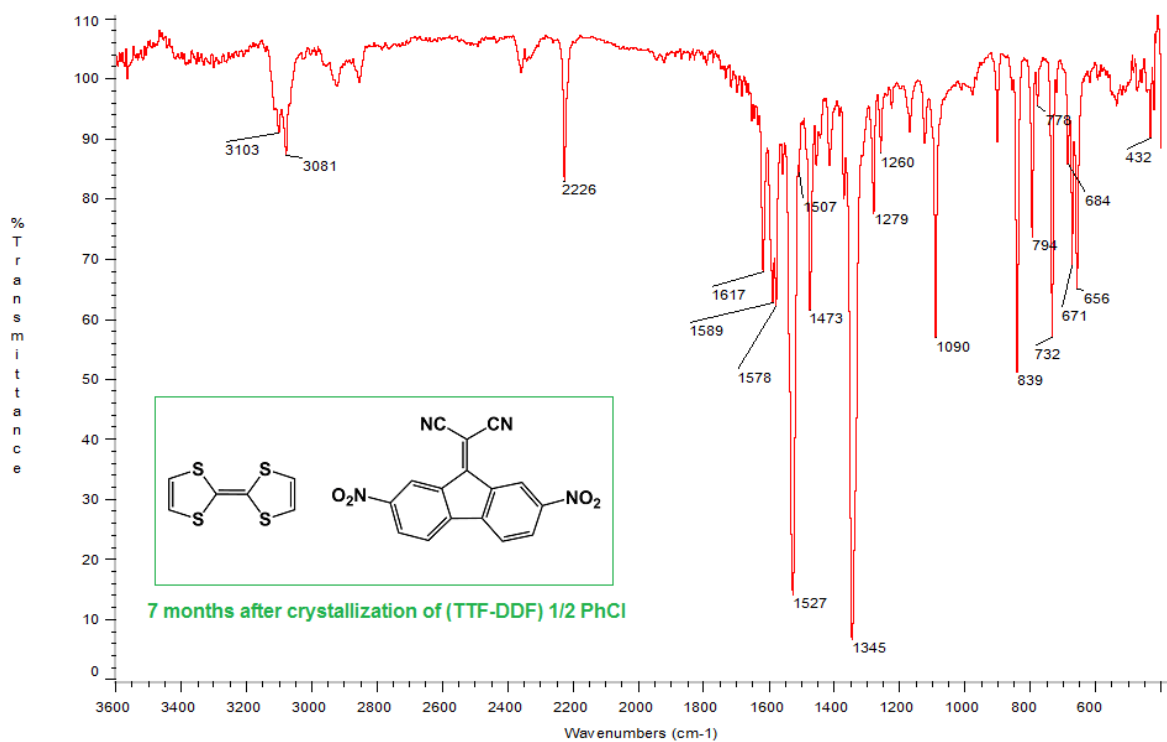

Fig. S10 FTIR of compound 2, seven months after crystallization

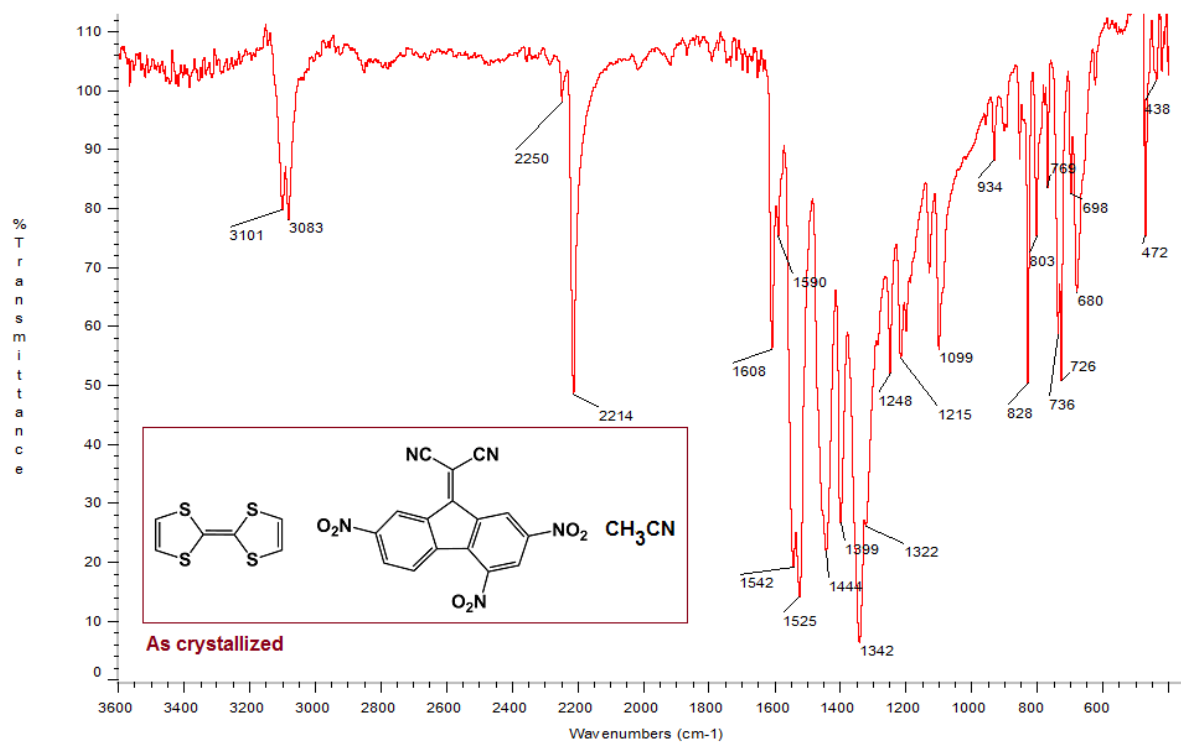

Fig. S11 FTIR of compound 3, just after crystallization

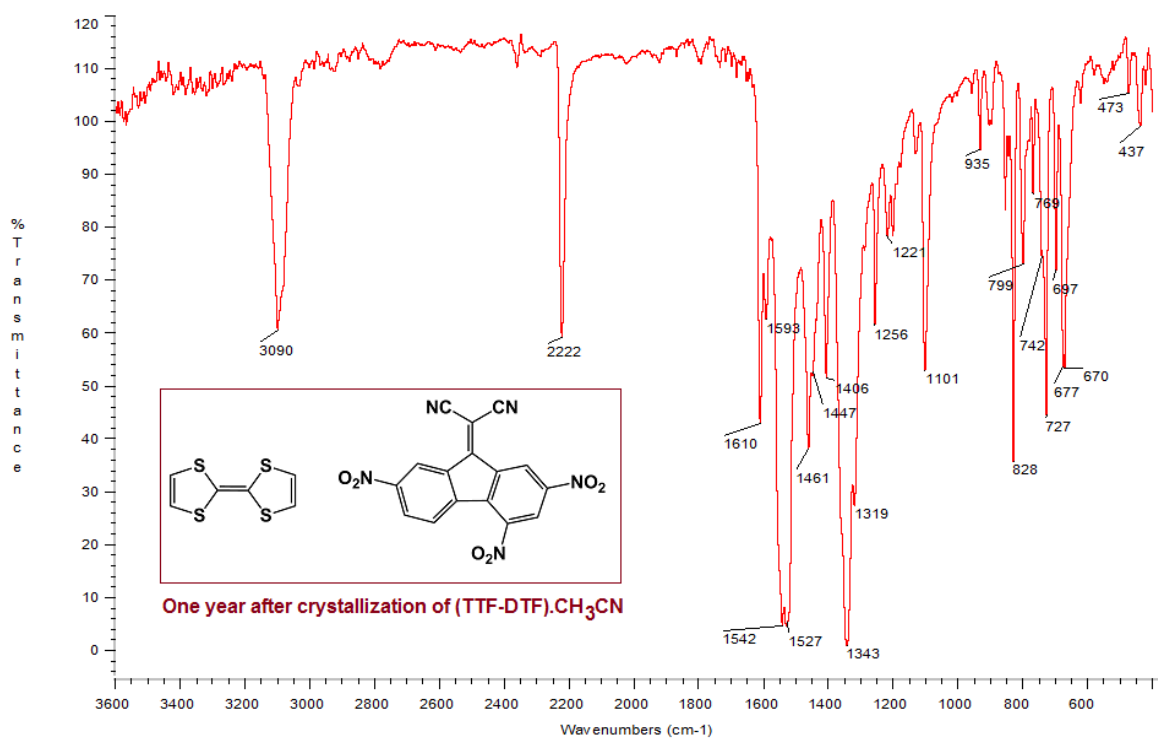

Fig. S12 FTIR of compound 3, one year after crystallization



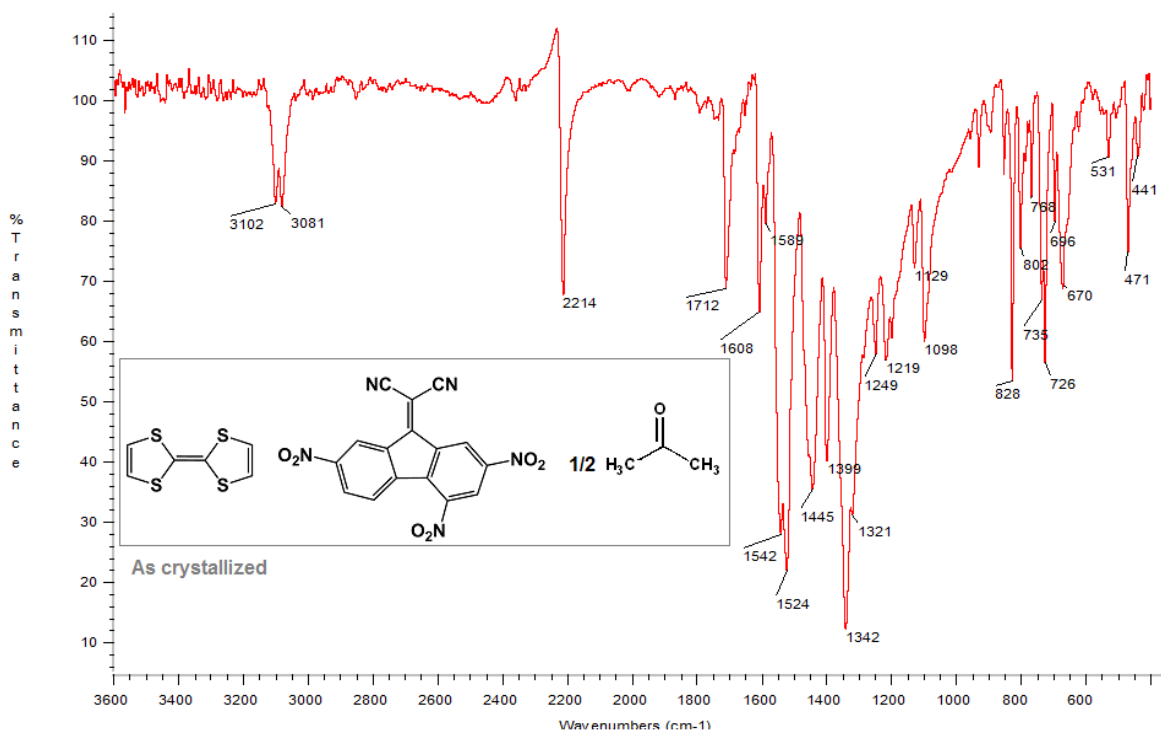

Fig. S13 FTIR of compound 4, just after crystallization

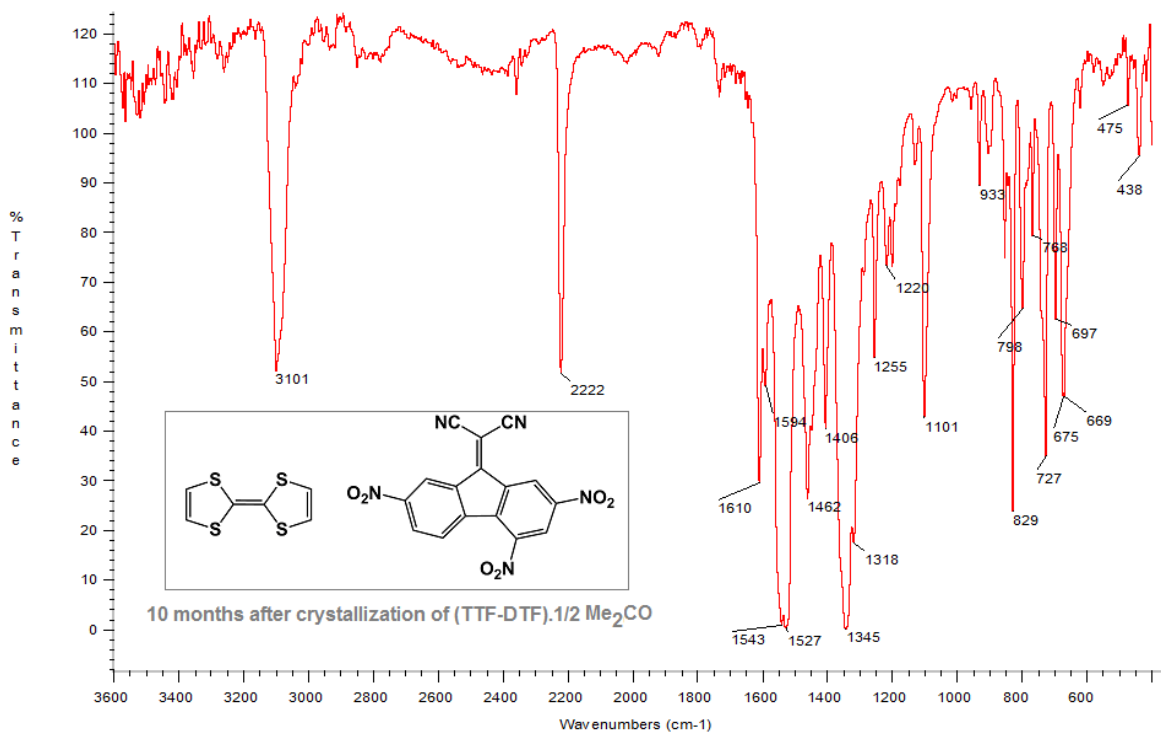

Fig. S14 FTIR of compound 4, ten months after crystallization

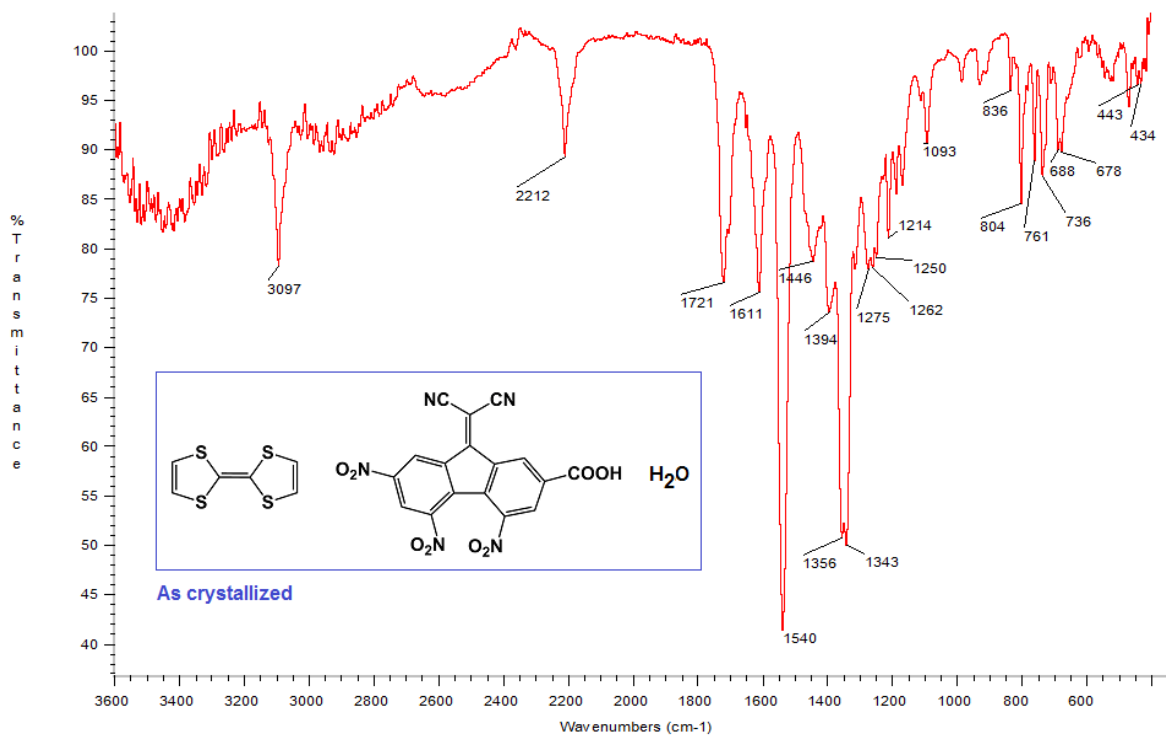

Fig. S15 FTIR of compound 5

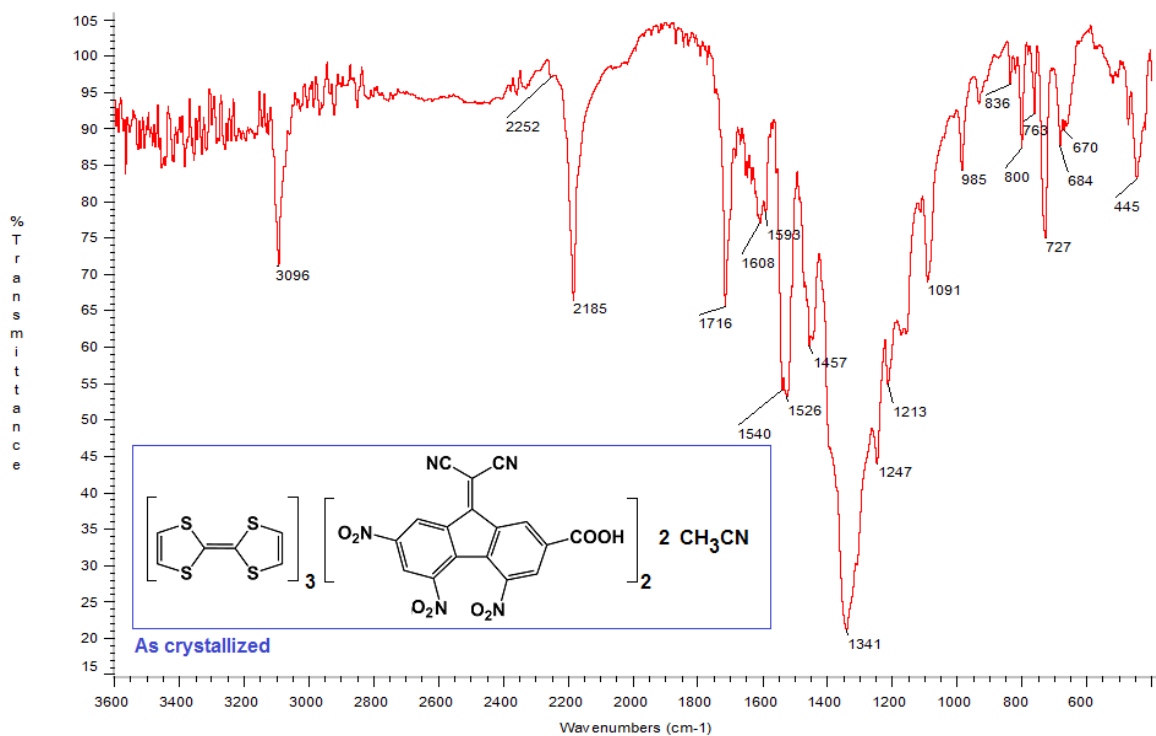

Fig. S16 FTIR of compound 6

**Table S17.** Crystal data and structure refinement for complex **1**

|                                                              |                                                                              |                            |
|--------------------------------------------------------------|------------------------------------------------------------------------------|----------------------------|
| Identification code                                          | <b>(TTF-DDF).CH<sub>3</sub>CN</b>                                            |                            |
| Empirical formula                                            | C <sub>24</sub> H <sub>13</sub> N <sub>5</sub> O <sub>4</sub> S <sub>4</sub> |                            |
| Formula weight                                               | 563.63                                                                       |                            |
| Temperature                                                  | 298(2) K                                                                     |                            |
| Wavelength                                                   | 0.71073 Å                                                                    |                            |
| Crystal system                                               | Monoclinic                                                                   |                            |
| Space group                                                  | P2 <sub>1</sub> /c                                                           |                            |
| Unit cell dimensions                                         | <i>a</i> = 7.141(2) Å                                                        | $\alpha = 90^\circ$ .      |
|                                                              | <i>b</i> = 17.151(4) Å                                                       | $\beta = 99.18(3)^\circ$ . |
|                                                              | <i>c</i> = 20.891(5) Å                                                       | $\gamma = 90^\circ$ .      |
| Volume                                                       | 2525.6(12) Å <sup>3</sup>                                                    |                            |
| Z                                                            | 4                                                                            |                            |
| Density (calculated)                                         | 1.482 Mg/m <sup>3</sup>                                                      |                            |
| Absorption coefficient                                       | 0.418 mm <sup>-1</sup>                                                       |                            |
| <i>F</i> (000)                                               | 1152                                                                         |                            |
| Crystal size                                                 | 0.60 x 0.14 x 0.10 mm <sup>3</sup>                                           |                            |
| $\theta$ range for data collection                           | 1.544 to 23.999°.                                                            |                            |
| Index ranges                                                 | -8 ≤ <i>h</i> ≤ 2, -1 ≤ <i>k</i> ≤ 19, -23 ≤ <i>l</i> ≤ 23                   |                            |
| Reflections collected                                        | 5355                                                                         |                            |
| Independent reflections                                      | 3950 [ <i>R</i> <sub>int</sub> = 0.0658]                                     |                            |
| Completeness to $\theta = 23.999^\circ$                      | 99.8 %                                                                       |                            |
| Absorption correction                                        | $\psi$ -scans (0.378 – 0.516)                                                |                            |
| Refinement method                                            | Full-matrix least-squares on <i>F</i> <sup>2</sup>                           |                            |
| Data / restraints / parameters                               | 3950 / 0 / 336                                                               |                            |
| Goodness-of-fit on <i>F</i> <sup>2</sup>                     | 1.096                                                                        |                            |
| Final <i>R</i> indices [ <i>I</i> > 2 $\sigma$ ( <i>I</i> )] | <i>R</i> <sub>1</sub> = 0.0664, <i>wR</i> <sub>2</sub> = 0.1564              |                            |
| <i>R</i> indices (all data)                                  | <i>R</i> <sub>1</sub> = 0.1038, <i>wR</i> <sub>2</sub> = 0.1773              |                            |
| Extinction coefficient                                       | 0.0005(3)                                                                    |                            |
| Largest diff. peak and hole                                  | 0.450 and -0.364 e.Å <sup>-3</sup>                                           |                            |

**Table S18.** Hydrogen bonds for **1** [Å and °]

| D-H...A              | d(D-H) | d(H...A) | d(D...A) | <(DHA) |
|----------------------|--------|----------|----------|--------|
| C(1)-H(1A)...N(12)   | 0.93   | 2.56     | 3.361(8) | 144.0  |
| C(6)-H(6A)...O(20)#1 | 0.93   | 2.58     | 3.373(7) | 143.7  |
| C(8)-H(8A)...N(14)   | 0.93   | 2.61     | 3.405(8) | 144.1  |

Symmetry transformations used to generate equivalent atoms:

#1 -x+1,-y,-z+1

Refinement for this complex was standard and carried out without restrictions nor constrictions. All H atoms were included in calculated positions and refined as riding to their carrier C atoms.

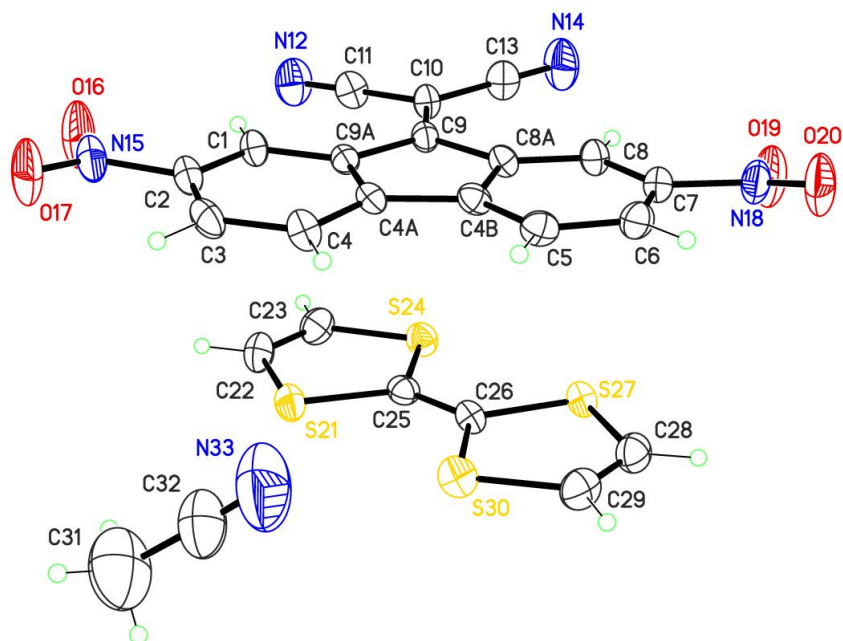

**Alert level B**

|                   |                                                                                                                    |             |
|-------------------|--------------------------------------------------------------------------------------------------------------------|-------------|
| THETM01 ALERT 3 B | The value of $\sin(\theta_{\max})/\lambda$ is less than 0.575<br>Calculated $\sin(\theta_{\max})/\lambda = 0.5723$ |             |
| PLAT031 ALERT 4 B | Refined Extinction Parameter within Range .....                                                                    | 1.667 Sigma |

**Alert level C**

|                   |                                                 |             |
|-------------------|-------------------------------------------------|-------------|
| PLAT242 ALERT 2 C | Low Ueq as Compared to Neighbors for .....      | N15 Check   |
| PLAT242 ALERT 2 C | Low Ueq as Compared to Neighbors for .....      | N18 Check   |
| PLAT244 ALERT 4 C | Low 'Solvent' Ueq as Compared to Neighbors of   | C32 Check   |
| PLAT340 ALERT 3 C | Low Bond Precision on C-C Bonds .....           | 0.0076 Ang. |
| PLAT906 ALERT 3 C | Large K value in the Analysis of Variance ..... | 7.200 Check |
| PLAT911 ALERT 3 C | Missing # FCF Refl Between THmin & STh/L= 0.572 | 8 Report    |

**Fig. S19** ORTEP view of complex **1** (asymmetric unit; 30% probability level) and checkCIF/PLATON report (Alert level G omitted)

**Table S20.** Crystal data and structure refinement for complex **2**

|                                                              |                                                                                                    |                         |
|--------------------------------------------------------------|----------------------------------------------------------------------------------------------------|-------------------------|
| Identification code                                          | <b>(TTF-DDF).0.5PhCl</b>                                                                           |                         |
| Empirical formula                                            | C <sub>25</sub> H <sub>12.50</sub> Cl <sub>0.50</sub> N <sub>4</sub> O <sub>4</sub> S <sub>4</sub> |                         |
| Formula weight                                               | 578.85                                                                                             |                         |
| Temperature                                                  | 296(2) K                                                                                           |                         |
| Wavelength                                                   | 0.71073 Å                                                                                          |                         |
| Crystal system                                               | Triclinic                                                                                          |                         |
| Space group                                                  | P-1                                                                                                |                         |
| Unit cell dimensions                                         | <i>a</i> = 7.3769(11) Å                                                                            | $\alpha$ = 81.218(7)°.  |
|                                                              | <i>b</i> = 9.3811(9) Å                                                                             | $\beta$ = 88.805(10)°.  |
|                                                              | <i>c</i> = 18.9293(19) Å                                                                           | $\gamma$ = 75.958(10)°. |
| Volume                                                       | 1255.8(3) Å <sup>3</sup>                                                                           |                         |
| Z                                                            | 2                                                                                                  |                         |
| Density (calculated)                                         | 1.531 Mg/m <sup>3</sup>                                                                            |                         |
| Absorption coefficient                                       | 0.473 mm <sup>-1</sup>                                                                             |                         |
| <i>F</i> (000)                                               | 590                                                                                                |                         |
| Crystal size                                                 | 0.44 x 0.18 x 0.10 mm <sup>3</sup>                                                                 |                         |
| $\theta$ range for data collection                           | 2.178 to 24.991°.                                                                                  |                         |
| Index ranges                                                 | -8 ≤ <i>h</i> ≤ 3, -11 ≤ <i>k</i> ≤ 10, -22 ≤ <i>l</i> ≤ 22                                        |                         |
| Reflections collected                                        | 6313                                                                                               |                         |
| Independent reflections                                      | 4400 [ <i>R</i> <sub>int</sub> = 0.0244]                                                           |                         |
| Completeness to $\theta$ = 24.991°                           | 99.7 %                                                                                             |                         |
| Absorption correction                                        | $\psi$ -scans (0.316 – 0.350)                                                                      |                         |
| Refinement method                                            | Full-matrix least-squares on <i>F</i> <sup>2</sup>                                                 |                         |
| Data / restraints / parameters                               | 4400 / 86 / 370                                                                                    |                         |
| Goodness-of-fit on <i>F</i> <sup>2</sup>                     | 1.014                                                                                              |                         |
| Final <i>R</i> indices [ <i>I</i> > 2 $\sigma$ ( <i>I</i> )] | <i>R</i> <sub>1</sub> = 0.0408, <i>wR</i> <sub>2</sub> = 0.0921                                    |                         |
| <i>R</i> indices (all data)                                  | <i>R</i> <sub>1</sub> = 0.0762, <i>wR</i> <sub>2</sub> = 0.1098                                    |                         |
| Extinction coefficient                                       | <i>n/a</i>                                                                                         |                         |
| Largest diff. peak and hole                                  | 0.178 and -0.301 e.Å <sup>-3</sup>                                                                 |                         |

**Table S21.** Hydrogen bonds for **2** [Å and °]

| D-H...A                    | d(D-H) | d(H...A) | d(D...A)  | <(DHA) |
|----------------------------|--------|----------|-----------|--------|
| C(1)-H(1A)...N(12)         | 0.93   | 2.63     | 3.427(4)  | 144.5  |
| C(8)-H(8A)...N(14)         | 0.93   | 2.65     | 3.451(4)  | 144.6  |
| C(22)-H(22A)...O(19)#20.93 |        | 2.48     | 3.098(4)  | 124.5  |
| C(23)-H(23A)...O(19)#20.93 |        | 2.65     | 3.181(4)  | 117.0  |
| C(32)-H(32A)...O(16)#30.93 |        | 2.59     | 3.189(15) | 123.0  |

Symmetry transformations used to generate equivalent atoms:

#1 -x+1,-y+1,-z+1 #2 -x,-y,-z #3 x,y+1,z

The chlorobenzene molecule is placed close to an inversion centre, and was refined with a s.o.f. constrained to  $\frac{1}{2}$ . The geometry and thermal behaviour for this molecule were restrained: all C–C bond lengths were restrained to 1.39(1) Å and the six-membered ring was restrained to be flat (standard *FLAT* command in *SHELXL*). Chlorobenzene C atoms (C31...C36) were also constrained to approximate an isotropic shape and to have similar ADP's (standard *ISOR* and *SIMU* commands in *SHELXL*). All H atoms were included in calculated positions and refined as riding to their carrier C atoms.

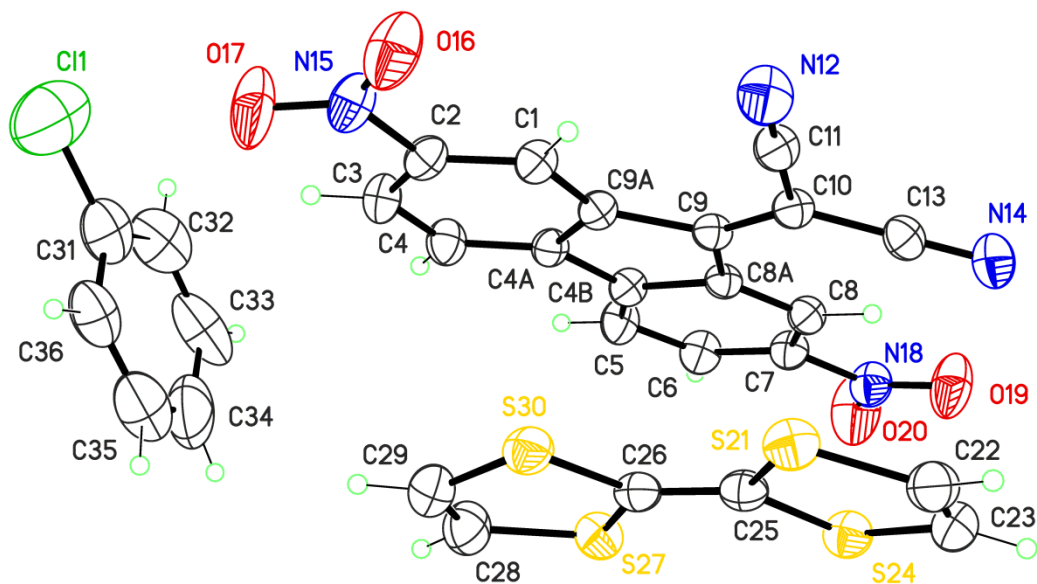

● Alert level C

|                   |            |                                            |        |        |
|-------------------|------------|--------------------------------------------|--------|--------|
| PLAT242 ALERT 2 C | Low        | Ueq as Compared to Neighbors for .....     | N15    | Check  |
| PLAT242 ALERT 2 C | Low        | Ueq as Compared to Neighbors for .....     | N18    | Check  |
| PLAT250 ALERT 2 C | Large      | U3/U1 Ratio for Average U(i,j) Tensor .... | 2.1    | Note   |
| PLAT340 ALERT 3 C | Low        | Bond Precision on C-C Bonds .....          | 0.0041 | Ang.   |
| PLAT480 ALERT 4 C | Long H...A | H-Bond Reported H8A .. N14 ..              | 2.65   | Ang.   |
| PLAT480 ALERT 4 C | Long H...A | H-Bond Reported H23A .. O19 ..             | 2.65   | Ang.   |
| PLAT906 ALERT 3 C | Large      | K value in the Analysis of Variance .....  | 2.359  | Check  |
| PLAT911 ALERT 3 C | Missing #  | FCF Refl Between THmin & STh/L= 0.594      | 13     | Report |

**Fig. S22** ORTEP view of complex **2** (asymmetric unit; 30% probability level) and checkCIF/PLATON report (Alert level G omitted)

**Table S23.** Crystal data and structure refinement for complex **3**

|                                                              |                                                                              |                       |
|--------------------------------------------------------------|------------------------------------------------------------------------------|-----------------------|
| Identification code                                          | <b>(TTF-DTF).CH<sub>3</sub>CN</b>                                            |                       |
| Empirical formula                                            | C <sub>24</sub> H <sub>12</sub> N <sub>6</sub> O <sub>6</sub> S <sub>4</sub> |                       |
| Formula weight                                               | 608.64                                                                       |                       |
| Temperature                                                  | 293(2) K                                                                     |                       |
| Wavelength                                                   | 0.71073 Å                                                                    |                       |
| Crystal system                                               | Orthorhombic                                                                 |                       |
| Space group                                                  | <i>Pbca</i>                                                                  |                       |
| Unit cell dimensions                                         | <i>a</i> = 7.1635(16) Å                                                      | $\alpha = 90^\circ$ . |
|                                                              | <i>b</i> = 19.881(4) Å                                                       | $\beta = 90^\circ$ .  |
|                                                              | <i>c</i> = 37.705(8) Å                                                       | $\gamma = 90^\circ$ . |
| Volume                                                       | 5370(2) Å <sup>3</sup>                                                       |                       |
| Z                                                            | 8                                                                            |                       |
| Density (calculated)                                         | 1.506 Mg/m <sup>3</sup>                                                      |                       |
| Absorption coefficient                                       | 0.406 mm <sup>-1</sup>                                                       |                       |
| <i>F</i> (000)                                               | 2480                                                                         |                       |
| Crystal size                                                 | 0.40 x 0.40 x 0.10 mm <sup>3</sup>                                           |                       |
| $\theta$ range for data collection                           | 2.049 to 25.003°.                                                            |                       |
| Index ranges                                                 | -8 ≤ <i>h</i> ≤ 1, -23 ≤ <i>k</i> ≤ 1, -1 ≤ <i>l</i> ≤ 44                    |                       |
| Reflections collected                                        | 6049                                                                         |                       |
| Independent reflections                                      | 4730 [ <i>R</i> <sub>int</sub> = 0.0273]                                     |                       |
| Completeness to $\theta = 25.003^\circ$                      | 100.0 %                                                                      |                       |
| Absorption correction                                        | $\psi$ -scans (0.200 – 0.240)                                                |                       |
| Refinement method                                            | Full-matrix least-squares on <i>F</i> <sup>2</sup>                           |                       |
| Data / restraints / parameters                               | 4730 / 111 / 417                                                             |                       |
| Goodness-of-fit on <i>F</i> <sup>2</sup>                     | 1.029                                                                        |                       |
| Final <i>R</i> indices [ <i>I</i> > 2 $\sigma$ ( <i>I</i> )] | <i>R</i> <sub>1</sub> = 0.0570, <i>wR</i> <sub>2</sub> = 0.1404              |                       |
| <i>R</i> indices (all data)                                  | <i>R</i> <sub>1</sub> = 0.1039, <i>wR</i> <sub>2</sub> = 0.1647              |                       |
| Extinction coefficient                                       | <i>n/a</i>                                                                   |                       |
| Largest diff. peak and hole                                  | 0.361 and -0.324 e.Å <sup>-3</sup>                                           |                       |

**Table S24.** Hydrogen bonds for **3** [Å and °]

| D-H...A                  | d(D-H) | d(H...A) | d(D...A)  | <(DHA) |
|--------------------------|--------|----------|-----------|--------|
| C(1)-H(1A)...N(12)       | 0.93   | 2.59     | 3.404(6)  | 146.2  |
| C(4)-H(4A)...O(20B)      | 0.93   | 2.09     | 2.795(8)  | 131.1  |
| C(5)-H(5A)...N(18A)      | 0.93   | 2.61     | 3.159(14) | 118.3  |
| C(5)-H(5A)...O(20A)      | 0.93   | 1.98     | 2.68(2)   | 131.6  |
| C(8)-H(8A)...N(14)       | 0.93   | 2.59     | 3.405(5)  | 146.4  |
| C(31)-H(31A)...O(16)#1   | 0.93   | 2.63     | 3.468(6)  | 150.8  |
| C(32)-H(32A)...O(19A)#2  | 0.93   | 2.41     | 3.309(18) | 161.1  |
| C(32)-H(32A)...O(20A)#2  | 0.93   | 2.50     | 3.225(13) | 134.6  |
| C(34A)-H(34A)...S(30)#3  | 0.96   | 2.86     | 3.62(2)   | 136.9  |
| C(34B)-H(34F)...N(36B)#1 | 0.96   | 2.59     | 3.46(3)   | 150.2  |

Symmetry transformations used to generate equivalent atoms:

#1  $x-1/2, y, -z+1/2$  #2  $-x+1/2, y-1/2, z$  #3  $x+1/2, y, -z+1/2$

In the acceptor molecule, nitro group bonded to C4 is disordered over two positions, N18A/O19A/O20A [sof = 0.317(6)] and N18B/O19B/O20B [sof = 1 - 0.317(6) = 0.683(6)], emulating  $C_2$  local symmetry for this molecule. The geometry of these nitro groups was restrained, with C4–N18A and C5–N18B bond lengths restrained to 1.49(2) Å, and N–O bond lengths restrained to 1.21(2) Å.

Acetonitrile is disordered over a number of positions, and was modelled using two sites, C34A/C35A/N36A [sof = 0.248(8)] and C34B/C35B/N36B [sof = 1 - 0.248(8) = 0.752(8)]. The geometry was restrained in order to target sensible bond lengths and angles in both sites: C34A–C35A = 1.44(1) Å, C35A–N36A = 1.14(1) Å, C34A...N36A = 2.58(1) Å, and similar restraints for B site. All C,N atoms for acetonitrile were restrained to approximate isotropic displacement parameters and to have similar  $U_{ij}$  values (standard *ISOR* and *SIMU* commands in *SHELXL*). All H atoms were included in calculated positions and refined as riding to their carrier C atoms.

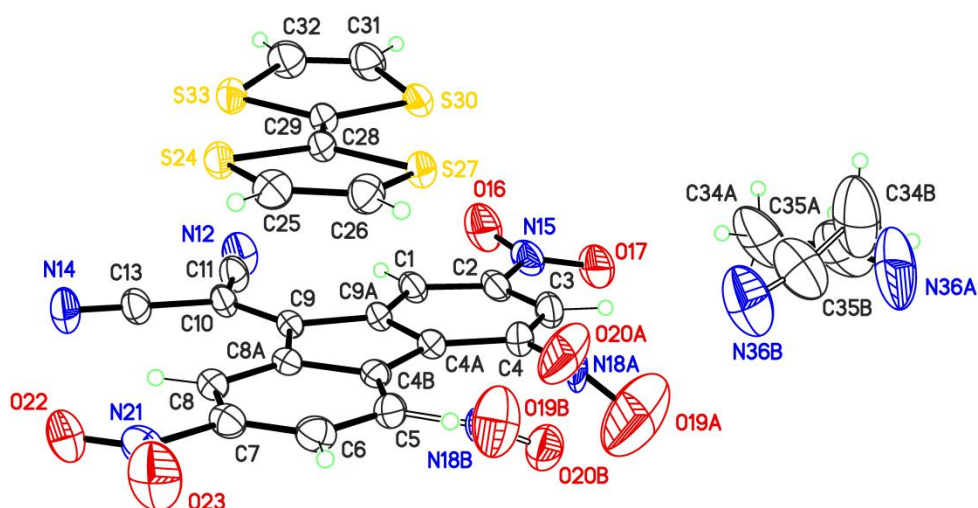

| ● Alert level C   |                                                 |                                        |        |       |
|-------------------|-------------------------------------------------|----------------------------------------|--------|-------|
| PLAT220 ALERT 2 C | Large Non-Solvent O                             | Ueq(max)/Ueq(min) Range                | 3.1    | Ratio |
| PLAT242 ALERT 2 C | Low                                             | Ueq as Compared to Neighbors for ..... | N15    | Check |
| PLAT242 ALERT 2 C | Low                                             | Ueq as Compared to Neighbors for ..... | N21    | Check |
| PLAT340 ALERT 3 C | Low Bond Precision on C-C Bonds .....           |                                        | 0.0055 | Ang.  |
| PLAT480 ALERT 4 C | Long H...A H-Bond Reported H31A ..              | O16 ..                                 | 2.63   | Ang.  |
| PLAT906 ALERT 3 C | Large K value in the Analysis of Variance ..... |                                        | 6.421  | Check |

**Fig. S25** ORTEP view of complex **3** (asymmetric unit; 20% probability level) and checkCIF/PLATON report (Alert level G omitted)



**Table S26.** Crystal data and structure refinement for complex **4**

|                                                              |                                                                                    |                       |
|--------------------------------------------------------------|------------------------------------------------------------------------------------|-----------------------|
| Identification code                                          | <b>(TTF-DTF).0.5Me<sub>2</sub>CO</b>                                               |                       |
| Empirical formula                                            | C <sub>23.50</sub> H <sub>12</sub> N <sub>5</sub> O <sub>6.50</sub> S <sub>4</sub> |                       |
| Formula weight                                               | 596.62                                                                             |                       |
| Temperature                                                  | 298(2) K                                                                           |                       |
| Wavelength                                                   | 0.71073 Å                                                                          |                       |
| Crystal system                                               | Orthorhombic                                                                       |                       |
| Space group                                                  | <i>Pbca</i>                                                                        |                       |
| Unit cell dimensions                                         | <i>a</i> = 7.1682(15) Å                                                            | $\alpha = 90^\circ$ . |
|                                                              | <i>b</i> = 19.902(6) Å                                                             | $\beta = 90^\circ$ .  |
|                                                              | <i>c</i> = 37.805(9) Å                                                             | $\gamma = 90^\circ$ . |
| Volume                                                       | 5393(2) Å <sup>3</sup>                                                             |                       |
| Z                                                            | 8                                                                                  |                       |
| Density (calculated)                                         | 1.470 Mg/m <sup>3</sup>                                                            |                       |
| Absorption coefficient                                       | 0.403 mm <sup>-1</sup>                                                             |                       |
| <i>F</i> (000)                                               | 2432                                                                               |                       |
| Crystal size                                                 | 0.60 x 0.16 x 0.08 mm <sup>3</sup>                                                 |                       |
| $\theta$ range for data collection                           | 2.047 to 22.534°.                                                                  |                       |
| Index ranges                                                 | -7 ≤ <i>h</i> ≤ 7, -21 ≤ <i>k</i> ≤ 21, -40 ≤ <i>l</i> ≤ 40                        |                       |
| Reflections collected                                        | 8389                                                                               |                       |
| Independent reflections                                      | 3545 [ <i>R</i> <sub>int</sub> = 0.1049]                                           |                       |
| Completeness to $\theta = 22.534^\circ$                      | 99.9 %                                                                             |                       |
| Absorption correction                                        | $\psi$ -scans (0.213 – 0.245)                                                      |                       |
| Refinement method                                            | Full-matrix least-squares on <i>F</i> <sup>2</sup>                                 |                       |
| Data / restraints / parameters                               | 3545 / 53 / 399                                                                    |                       |
| Goodness-of-fit on <i>F</i> <sup>2</sup>                     | 1.092                                                                              |                       |
| Final <i>R</i> indices [ <i>I</i> > 2 $\sigma$ ( <i>I</i> )] | <i>R</i> <sub>1</sub> = 0.0621, <i>wR</i> <sub>2</sub> = 0.1472                    |                       |
| <i>R</i> indices (all data)                                  | <i>R</i> <sub>1</sub> = 0.1109, <i>wR</i> <sub>2</sub> = 0.1848                    |                       |
| Extinction coefficient                                       | 0.00053(17)                                                                        |                       |
| Largest diff. peak and hole                                  | 0.409 and -0.284 e.Å <sup>-3</sup>                                                 |                       |

**Table S27.** Hydrogen bonds for **4** [Å and °]

| D-H...A                 | d(D-H) | d(H...A) | d(D...A)  | <(DHA) |
|-------------------------|--------|----------|-----------|--------|
| C(1)-H(1A)...N(12)      | 0.93   | 2.59     | 3.410(8)  | 146.9  |
| C(4)-H(4A)...O(20B)     | 0.93   | 1.95     | 2.667(13) | 132.5  |
| C(5)-H(5A)...N(18A)     | 0.93   | 2.63     | 3.182(16) | 118.6  |
| C(5)-H(5A)...O(20A)     | 0.93   | 2.00     | 2.72(3)   | 132.8  |
| C(8)-H(8A)...N(14)      | 0.93   | 2.63     | 3.442(8)  | 146.2  |
| C(26)-H(26A)...O(23)#1  | 0.93   | 2.63     | 3.268(8)  | 126.2  |
| C(31)-H(31A)...O(16)#2  | 0.93   | 2.65     | 3.489(9)  | 150.8  |
| C(32)-H(32A)...O(19A)#3 | 0.93   | 2.33     | 3.25(2)   | 169.2  |
| C(32)-H(32A)...O(20A)#3 | 0.93   | 2.52     | 3.241(18) | 134.5  |
| C(37)-H(37A)...O(35)#4  | 0.96   | 2.52     | 2.99(6)   | 110.4  |
| C(37)-H(37B)...O(16)#5  | 0.96   | 2.11     | 3.00(4)   | 152.5  |

Symmetry transformations used to generate equivalent atoms:

#1 -*x*, -*y*+1, -*z*+1 #2 *x*-1/2, *y*, -*z*+1/2 #3 -*x*+1/2, *y*-1/2, *z*#4 *x*+1/2, *y*, -*z*+1/2 #5 -*x*+3/2, *y*+1/2, *z*

In the acceptor molecule, nitro group bonded to C4 is disordered over two positions, N18A/O19A/O20A [sof = 0.365(10)] and N18B/O19B/O20B [sof = 1 - 0.365(10) = 0.635(10)], emulating the  $C_2$  local symmetry for this molecule. The geometry of these nitro groups was restrained as in isomorphous complex **3**.

Acetone is strongly disordered and was modelled with a single position with fully restrained geometry: C34–C36 and C34–C37 bond lengths were restrained to 1.46(1) Å, and C36...C37 separation to 2.51(2) Å. Carbonyl bond length was restrained to C34–O35 = 1.20(1) Å and the whole molecule was restrained to be flat (standard *FLAT* command in *SHELXL*). Finally, ADP's for acetone were restrained to be similar and approximate an isotropic behaviour (standard *SIMU* and *ISOR* commands in *SHELXL*). All H atoms were included in calculated positions and refined as riding to their carrier C atoms.

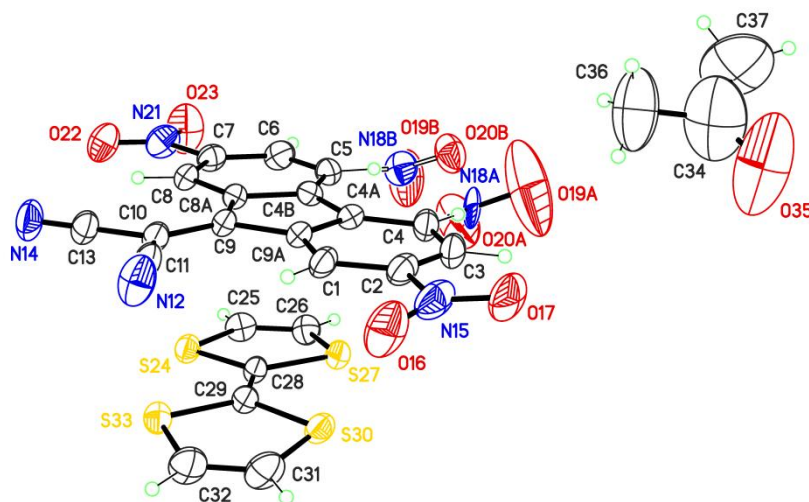

#### Alert level A

THETM01 ALERT 3 A The value of  $\sin(\theta_{\max})/\lambda$  is less than 0.550  
Calculated  $\sin(\theta_{\max})/\lambda = 0.5392$

**Author Response: Poor diffraction, probably related to solvent loss Poor diffraction, probably related to solvent loss**

#### Alert level C

REFNR01 ALERT 3 C Ratio of reflections to parameters is < 10 for a centrosymmetric structure  
 $\sin(\theta)/\lambda$  0.5392  
Proportion of unique data used 1.0000  
Ratio reflections to parameters 8.8847

|                   |                                                   |        |        |
|-------------------|---------------------------------------------------|--------|--------|
| PLAT031 ALERT 4 C | Refined Extinction Parameter within Range .....   | 3.118  | Sigma  |
| PLAT088 ALERT 3 C | Poor Data / Parameter Ratio .....                 | 8.88   | Note   |
| PLAT213 ALERT 2 C | Atom O19A has ADP max/min Ratio .....             | 3.5    | prolat |
| PLAT213 ALERT 2 C | Atom N18A has ADP max/min Ratio .....             | 3.1    | oblate |
| PLAT220 ALERT 2 C | Large Non-Solvent O Ueq(max)/Ueq(min) Range ..... | 3.3    | Ratio  |
| PLAT234 ALERT 4 C | Large Hirshfeld Difference O19B -- N18B ..        | 0.20   | Ang.   |
| PLAT234 ALERT 4 C | Large Hirshfeld Difference N18B -- C5 ..          | 0.16   | Ang.   |
| PLAT340 ALERT 3 C | Low Bond Precision on C-C Bonds .....             | 0.0082 | Ang.   |
| PLAT480 ALERT 4 C | Long H...A H-Bond Reported H26A .. O23 ..         | 2.63   | Ang.   |
| PLAT480 ALERT 4 C | Long H...A H-Bond Reported H31A .. O16 ..         | 2.65   | Ang.   |
| PLAT906 ALERT 3 C | Large K value in the Analysis of Variance .....   | 2.743  | Check  |
| PLAT911 ALERT 3 C | Missing # PCF Refl Between THmin & STh/L= 0.539   | 4      | Report |

**Fig. S28** ORTEP view of complex **4** (asymmetric unit; 20% probability level) and checkCIF/PLATON report (Alert level G omitted)

**Table S29.** Crystal data and structure refinement for complex **5**

|                                         |                                                                              |                              |
|-----------------------------------------|------------------------------------------------------------------------------|------------------------------|
| Identification code                     | <b>(TTF-DC2TF).H<sub>2</sub>O</b>                                            |                              |
| Empirical formula                       | C <sub>23</sub> H <sub>11</sub> N <sub>5</sub> O <sub>9</sub> S <sub>4</sub> |                              |
| Formula weight                          | 629.61                                                                       |                              |
| Temperature                             | 298(2) K                                                                     |                              |
| Wavelength                              | 0.71073 Å                                                                    |                              |
| Crystal system                          | Monoclinic                                                                   |                              |
| Space group                             | C2/c                                                                         |                              |
| Unit cell dimensions                    | $a = 15.9432(14)$ Å                                                          | $\alpha = 90^\circ$ .        |
|                                         | $b = 12.1351(9)$ Å                                                           | $\beta = 104.572(7)^\circ$ . |
|                                         | $c = 13.5738(11)$ Å                                                          | $\gamma = 90^\circ$ .        |
| Volume                                  | 2541.7(4) Å <sup>3</sup>                                                     |                              |
| Z                                       | 4                                                                            |                              |
| Density (calculated)                    | 1.645 Mg/m <sup>3</sup>                                                      |                              |
| Absorption coefficient                  | 0.439 mm <sup>-1</sup>                                                       |                              |
| F(000)                                  | 1280                                                                         |                              |
| Crystal size                            | 0.60 x 0.34 x 0.20 mm <sup>3</sup>                                           |                              |
| $\theta$ range for data collection      | 2.135 to 27.499°.                                                            |                              |
| Index ranges                            | -20 ≤ $h$ ≤ 13, -15 ≤ $k$ ≤ 15, -17 ≤ $l$ ≤ 17                               |                              |
| Reflections collected                   | 6560                                                                         |                              |
| Independent reflections                 | 2918 [ $R_{\text{int}} = 0.0256$ ]                                           |                              |
| Completeness to $\theta = 25.242^\circ$ | 99.9 %                                                                       |                              |
| Absorption correction                   | $\psi$ -scans (0.286 – 0.336)                                                |                              |
| Refinement method                       | Full-matrix least-squares on $F^2$                                           |                              |
| Data / restraints / parameters          | 2918 / 14 / 227                                                              |                              |
| Goodness-of-fit on $F^2$                | 1.064                                                                        |                              |
| Final $R$ indices [ $>2\sigma(I)$ ]     | $R_1 = 0.0547$ , $wR_2 = 0.1448$                                             |                              |
| $R$ indices (all data)                  | $R_1 = 0.0647$ , $wR_2 = 0.1511$                                             |                              |
| Extinction coefficient                  | $n/a$                                                                        |                              |
| Largest diff. peak and hole             | 0.912 and -0.390 e.Å <sup>-3</sup>                                           |                              |

**Table S30.** Hydrogen bonds for **5** [Å and °]

| D-H...A                 | d(D-H)  | d(H...A) | d(D...A)  | <(DHA)  |
|-------------------------|---------|----------|-----------|---------|
| O(13A)-H(13A)...O(22)   | 0.88(2) | 2.41(6)  | 3.03(2)   | 128(6)  |
| O(22)-H(22A)...O(15)#3  | 0.85(2) | 2.18(6)  | 2.944(6)  | 150(11) |
| O(22)-H(22A)...O(22)#4  | 0.85(2) | 2.41(10) | 2.869(14) | 115(9)  |
| O(22)-H(22B)...O(12A)#4 | 0.85(2) | 1.85(3)  | 2.697(19) | 173(11) |
| O(22)-H(22B)...O(12B)#4 | 0.85(2) | 1.85(4)  | 2.682(11) | 167(12) |

Symmetry transformations used to generate equivalent atoms:

#1 -x+1,y,-z+3/2 #2 -x+1,-y+1,-z+1 #3 -x+3/2,y-1/2,-z+3/2

#4 -x+2,-y+1,-z+2

The acceptor molecule is placed on the twofold crystallographic axis in *C2/c* space group and has then substituents bonded at C2 and C2' disordered (carboxylic group C11A/O12A/O13A/H13A and nitro group N11B/O12B/O13B, both with *sof*'s constrained by symmetry to ½). The carboxylic group was restrained to a sensible geometry: C2–C11A = 1.49(2) Å, C11A–O12A = 1.22(2) Å, C11A–O13A = 1.30(4) Å, O12A...O13A = 2.22(4) Å, O13A–H13A = 0.88(2) Å and O12A...H13A = 2.35(4) Å. The carboxylic acid group was restrained to be flat (standard *FLAT* command in *SHELXL*). The geometry of the disordered nitro group was also restrained: C2–N11B = 1.47(2) Å, N–O bond lengths = 1.21(2) Å, and O12B...O13B = 2.15(4) Å. The TTF molecule is placed across an inversion centre and was refined freely. For the *DA* complex, C-bonded H atoms were included in calculated positions and refined as riding to their carrier C atoms. The hydroxyl H atom H13A was first located in a difference map, and its position geometrically restrained as described above. The water molecule O22 is placed close to an inversion centre, and was refined with *sof* constrained to ½. H atoms H22A and H22B were first found in a difference map, and the geometry of the water molecule was eventually restrained with O–H bond lengths = 0.85(2) Å and H...H separation = 1.35(4) Å. C-bonded H atoms were included in calculated positions and refined as riding to their carrier atoms.

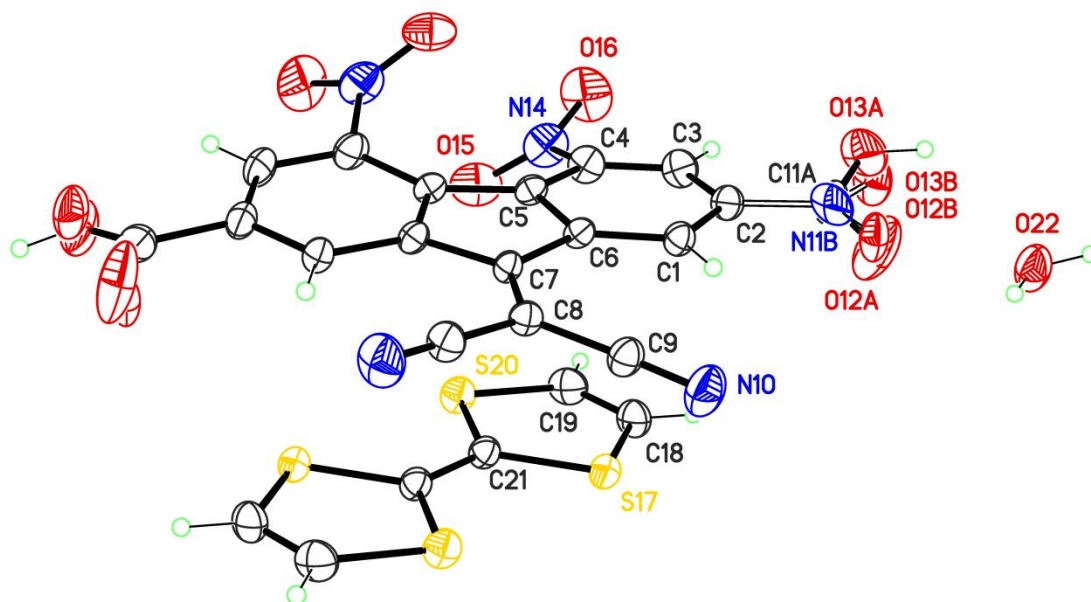

**Alert level B**

PLAT782 ALERT 2 B Unusual Bond Geometry for C-NO2 Moiety Around N14 Check

**Alert level C**

|                   |                                                 |        |          |
|-------------------|-------------------------------------------------|--------|----------|
| PLAT094 ALERT 2 C | Ratio of Maximum / Minimum Residual Density ... | 2.34   | Report   |
| PLAT215 ALERT 3 C | Disordered N11B has ADP max/min Ratio .....     | 3.2    |          |
| PLAT340 ALERT 3 C | Low Bond Precision on C-C Bonds .....           | 0.0041 | Ang.     |
| PLAT906 ALERT 3 C | Large K value in the Analysis of Variance ..... | 4.577  | Check    |
| PLAT911 ALERT 3 C | Missing # FCF Refl Between THmin & STh/L=       | 0.600  | 3 Report |
| PLAT975 ALERT 2 C | Check Calcd Residual Density 1.05A From O15     | 0.83   | eA-3     |

**Fig. S31** ORTEP view of complex 5 (30% probability level) and checkCIF/PLATON report (Alert level G omitted). Unlabelled atoms are generated by symmetry operators 1-x, y, 3/2-z (*DC*<sub>2</sub>*TF* molecule) and 1-x, 1-y, 1-z (*TTF* molecule).

**Table S32.** Crystal data and structure refinement for complex **6**

|                                                              |                                                                                 |                         |
|--------------------------------------------------------------|---------------------------------------------------------------------------------|-------------------------|
| Identification code                                          | <b>(TTF)<sub>3</sub>(DC2TF)<sub>2</sub>·2CH<sub>3</sub>CN</b>                   |                         |
| Empirical formula                                            | C <sub>56</sub> H <sub>28</sub> N <sub>12</sub> O <sub>16</sub> S <sub>12</sub> |                         |
| Formula weight                                               | 1509.62                                                                         |                         |
| Temperature                                                  | 298(2) K                                                                        |                         |
| Wavelength                                                   | 0.71073 Å                                                                       |                         |
| Crystal system                                               | Triclinic                                                                       |                         |
| Space group                                                  | <i>P</i> -1                                                                     |                         |
| Unit cell dimensions                                         | <i>a</i> = 10.0608(10) Å                                                        | $\alpha$ = 107.535(8)°. |
|                                                              | <i>b</i> = 10.3528(11) Å                                                        | $\beta$ = 100.525(9)°.  |
|                                                              | <i>c</i> = 15.612(2) Å                                                          | $\gamma$ = 90.877(8)°.  |
| Volume                                                       | 1520.2(3) Å <sup>3</sup>                                                        |                         |
| <i>Z</i>                                                     | 1                                                                               |                         |
| Density (calculated)                                         | 1.649 Mg/m <sup>3</sup>                                                         |                         |
| Absorption coefficient                                       | 0.513 mm <sup>-1</sup>                                                          |                         |
| <i>F</i> (000)                                               | 768                                                                             |                         |
| Crystal size                                                 | 0.40 x 0.40 x 0.24 mm <sup>3</sup>                                              |                         |
| $\theta$ range for data collection                           | 2.065 to 25.000°.                                                               |                         |
| Index ranges                                                 | -11 ≤ <i>h</i> ≤ 11, -11 ≤ <i>k</i> ≤ 11, -18 ≤ <i>l</i> ≤ 18                   |                         |
| Reflections collected                                        | 6125                                                                            |                         |
| Independent reflections                                      | 5172 [ <i>R</i> <sub>int</sub> = 0.0467]                                        |                         |
| Completeness to $\theta$ = 25.000°                           | 96.9 %                                                                          |                         |
| Absorption correction                                        | $\psi$ -scans (0.349 – 0.393)                                                   |                         |
| Refinement method                                            | Full-matrix least-squares on <i>F</i> <sup>2</sup>                              |                         |
| Data / restraints / parameters                               | 5172 / 1 / 437                                                                  |                         |
| Goodness-of-fit on <i>F</i> <sup>2</sup>                     | 1.059                                                                           |                         |
| Final <i>R</i> indices [ <i>I</i> > 2 $\sigma$ ( <i>I</i> )] | <i>R</i> <sub>1</sub> = 0.0569, <i>wR</i> <sub>2</sub> = 0.1385                 |                         |
| <i>R</i> indices (all data)                                  | <i>R</i> <sub>1</sub> = 0.0862, <i>wR</i> <sub>2</sub> = 0.1567                 |                         |
| Extinction coefficient                                       | <i>n/a</i>                                                                      |                         |
| Largest diff. peak and hole                                  | 0.413 and -0.354 e.Å <sup>-3</sup>                                              |                         |

**Table S33.** Hydrogen bonds for **6** [Å and °]

| D-H...A                | d(D-H)    | d(H...A)  | d(D...A) | <(DHA) |
|------------------------|-----------|-----------|----------|--------|
| C(6)-H(6A)...S(33)#2   | 0.93      | 2.99      | 3.908(4) | 169.5  |
| C(8)-H(8A)...N(14)     | 0.93      | 2.58      | 3.364(6) | 142.6  |
| O(16)-H(16)...O(17)#3  | 0.951(10) | 1.748(13) | 2.697(4) | 175(6) |
| C(28)-H(28A)...O(25)#4 | 0.93      | 2.60      | 3.274(6) | 130.0  |
| C(34)-H(34A)...N(44)#5 | 0.93      | 2.51      | 3.239(8) | 135.5  |
| C(35)-H(35A)...N(14)#6 | 0.93      | 2.59      | 3.470(6) | 157.4  |
| C(39)-H(39A)...N(12)#2 | 0.93      | 2.46      | 3.343(7) | 159.1  |
| C(42)-H(42B)...O(22)#7 | 0.96      | 2.66      | 3.452(9) | 140.2  |

Symmetry transformations used to generate equivalent atoms:

#1 -*x*, -*y*, -*z*+2 #2 *x*+1, *y*, *z* #3 -*x*-1, -*y*+1, -*z*+2#4 -*x*, -*y*-1, -*z*+1 #5 -*x*, -*y*+1, -*z*+2 #6 *x*, *y*+1, *z* #7 -*x*+1, -*y*+1, -*z*+2

Refinement for this complex was standard and carried out without restrictions nor constrictions. All H atoms were included in calculated positions and refined as riding to their carrier C atoms.

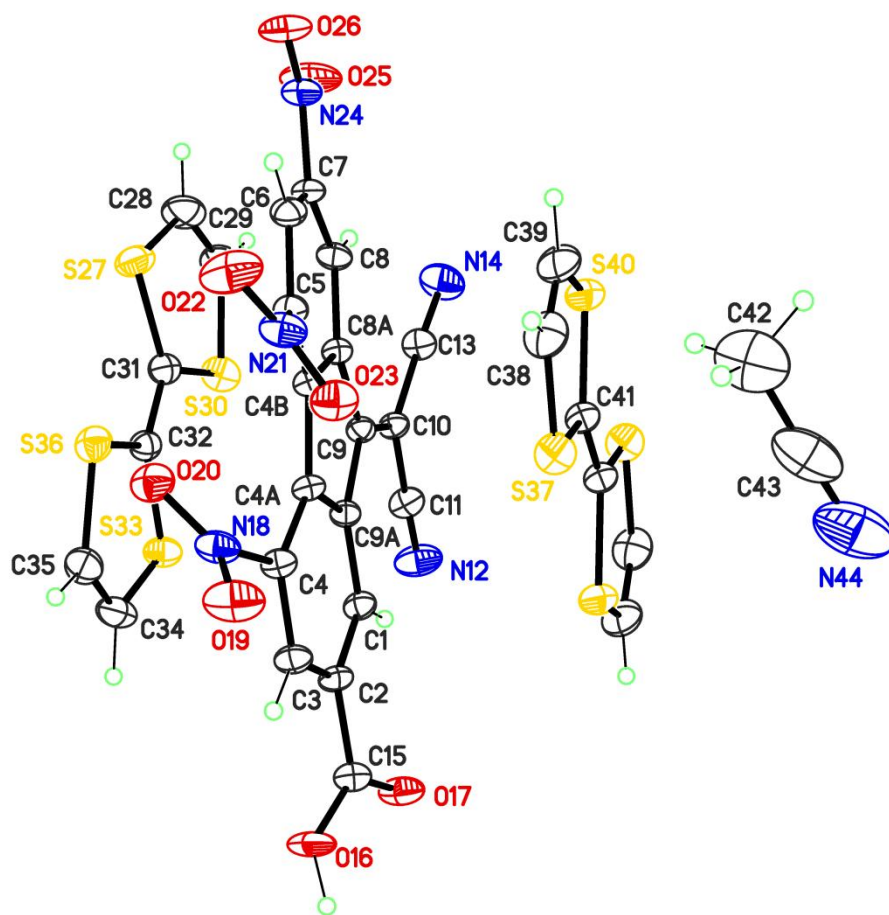

● Alert level C

|         |         |   |                                               |       |       |        |            |
|---------|---------|---|-----------------------------------------------|-------|-------|--------|------------|
| PLAT029 | ALERT 3 | C | _diffrn_measured_fraction_theta_full          | Low   | ..... | 0.969  | Note       |
| PLAT244 | ALERT 4 | C | Low 'Solvent' Ueq as Compared to Neighbors of |       |       |        | C43 Check  |
| PLAT340 | ALERT 3 | C | Low Bond Precision on C-C Bonds               | ..... |       | 0.0066 | Ang.       |
| PLAT480 | ALERT 4 | C | Long H...A H-Bond Reported H6A                | ..    | S33   | ..     | 2.99 Ang.  |
| PLAT480 | ALERT 4 | C | Long H...A H-Bond Reported H42B               | ..    | O22   | ..     | 2.66 Ang.  |
| PLAT906 | ALERT 3 | C | Large K value in the Analysis of Variance     | ..... |       | 3.274  | Check      |
| PLAT911 | ALERT 3 | C | Missing # FCF Refl Between THmin & STh/L=     | 0.595 |       |        | 133 Report |

**Fig. S34** ORTEP view of complex **6** (30% probability level) and checkCIF/PLATON report (Alert level G omitted). Unlabelled atoms in one TTF molecule are generated by symmetry operator  $-x, -y, 2-z$
